# Supplementary material for: Proteome stability, heat hardening, and heat-shock protein expression profiles in Cataglyphis desert ants
Source: Oxford University Press journal article supplement (doi:10.1242/jeb.154161), 2017-01-01
Supplement: jeb154161supp.pdf [file jeb154161supp.pdf]

Table S1. Primer sets for qPCR including housekeeping genes.

| Gene                     | Primer 5'-3'               | Amplicon Length (bps) |
|--------------------------|----------------------------|-----------------------|
| $\beta$ -actin (forward) | TATTATTGCTACACCTTTCCTAAG   |                       |
| $\beta$ -actin (reverse) | TTCGACTAACAGATCCAACATAAC   | 76                    |
| Ef1- $\beta$ (forward)   | AGAAAGCCCAGAAGAAGAAATAAC   |                       |
| Ef1- $\beta$ (reverse)   | CACCCATATTGCACGGA          | 76                    |
| hsc70-4_1 (forward)      | CTCCGCTCTCTCTGGGTATC       |                       |
| hsc70-4_1 (reverse)      | CGGGATGGTAGTGTTCCTCTT      | 74                    |
| hsc70-4_2 (forward)      | ACCGACTAGAACTATACTGTGAAC   |                       |
| hsc70-4_2 (reverse)      | TTGAACCCGTCGAGAAAGC        | 74                    |
| hsc70-5 (forward)        | ACATGGTTGAATAGTACGCTTAA    |                       |
| hsc70-5 (reverse)        | TGAATCTTAAACTGTCCAGAAGTAA  | 74                    |
| hsp83 (forward)          | TGACGAAATGTGCTCTCTTAAAG    |                       |
| hsp83 (reverse)          | AGTGATGTAGTAAATGTGCTTCTG   | 73                    |
| hsf1 (forward)           | TGTAGTATGTATTGTAACCTCAGTGA |                       |
| hsf1 (reverse)           | CTCCATTCTCCAACATCCTAGATT   | 80                    |
